# Supplementary material for: Cryptic diversity and deep divergence in an upper Amazonian leaflitter frog, Eleutherodactylus ockendeni
Source: PubMed Central journal article supplement (PMC2254618; doi:10.1186/1471-2148-7-247), 2007-12-21
Supplement: 1471-2148-7-247-S1.pdf [file 1471-2148-7-247-S1.pdf]

Additional file 1.

| QCAZ  | Cyt <i>b</i> | 16S      | Locality    |
|-------|--------------|----------|-------------|
| 14891 |              | EU130586 | Yasuní      |
| 14893 |              | EU130589 | Yasuní      |
| 14895 | EU130632     | EU130587 | Yasuní      |
| 14896 | EU130631     |          | Yasuní      |
| 14897 | EU130630     |          | Yasuní      |
| 14898 | EU130633     | EU130588 | Yasuní      |
| 18023 |              | EU130581 | EBJS        |
| 18027 | EF581014     |          | EBJS        |
| 18030 | EF581015     |          | EBJS        |
| 18033 | EF581016     |          | EBJS        |
| 18039 | EF581017     |          | EBJS        |
| 18041 | EF581018     |          | EBJS        |
| 18045 | EF581019     |          | EBJS        |
| 18053 | EF581020     |          | EBJS        |
| 18069 | EF581021     | EU130582 | EBJS        |
| 18071 | EF581022     |          | EBJS        |
| 18077 | EF581023     |          | EBJS        |
| 18085 | EF581024     |          | EBJS        |
| 18089 | EF581025     |          | EBJS        |
| 18092 | EF581026     |          | EBJS        |
| 18096 | EF581027     |          | EBJS        |
| 18098 | EF581028     |          | EBJS        |
| 18110 | EF581029     |          | EBJS        |
| 18112 | EF581030     |          | EBJS        |
| 18117 | EF581031     |          | EBJS        |
| 18126 | EF581032     |          | EBJS        |
| 18128 | EF581033     |          | EBJS        |
| 18132 | EF581034     | EU130583 | EBJS        |
| 18137 | EF581035     |          | EBJS        |
| 18139 | EF581036     |          | EBJS        |
| 18148 | EU130627     |          | EBJS        |
| 18153 | EF581037     |          | EBJS        |
| 18156 | EU130628     | EU130584 | Puca Chicta |
| 18157 | EU130629     | EU130585 | Puca Chicta |
| 18165 | EF581013     |          | EBJS        |
| 19208 | EU130678     |          | Yasuní      |
| 25165 | EU130673     | EU130622 | Hola Vida   |
| 25273 | EU130679     | EU130626 | Auca 14     |
| 25277 | EU130680     | EU130594 | Auca 14     |
| 25287 | EF581048     |          | EBJS        |
| 25288 | EF581049     |          | EBJS        |
| 25290 | EF581051     |          | EBJS        |
| 25291 | EF581050     |          | EBJS        |
| 25295 | EF581052     | EU130595 | EBJS        |
| 25306 | EU130650     | EU130606 | Cando       |
| 25307 | EU130651     |          | Cando       |
| 25308 | EU130652     |          | Cando       |

|       |          |          |             |
|-------|----------|----------|-------------|
| 25309 | EU130653 | EU130607 | Cando       |
| 25310 | EU130654 |          | Cando       |
| 25313 |          | EU130608 | Cando       |
| 25324 | EU130647 | EU130605 | Cando       |
| 25325 | EU130648 |          | Cando       |
| 25326 | EU130649 |          | Cando       |
| 25327 | EU130655 | EU130609 | Llanganates |
| 25328 | EU130656 | EU130610 | Llanganates |
| 25337 |          | EU130611 | Santa Clara |
| 25343 | EU130657 | EU130612 | Santa Clara |
| 25344 | EU130658 |          | Santa Clara |
| 25345 | EU130659 |          | Santa Clara |
| 25348 | EU130660 |          | Santa Clara |
| 25349 | EU130661 | EU130613 | Santa Clara |
| 25372 |          | EU130614 | Santa Clara |
| 25427 | EU130662 | EU130615 | La Selva    |
| 25428 | EU130663 | EU130616 | La Selva    |
| 25429 | EU130664 |          | La Selva    |
| 25439 | EU130665 | EU130617 | EBJS        |
| 25445 | EU130666 |          | EBJS        |
| 25447 | EU130667 |          | EBJS        |
| 25457 | EU130668 | EU130618 | Kapawi      |
| 25458 | EU130669 |          | Kapawi      |
| 25459 | EU130670 |          | Kapawi      |
| 25462 |          | EU130619 | Kapawi      |
| 25492 |          | EU130620 | Kapawi      |
| 25526 | EU130671 |          | Kapawi      |
| 25527 | EU130672 | EU130621 | Kapawi      |
| 25552 | EF581039 |          | EBJS        |
| 25554 | EF581040 |          | EBJS        |
| 25555 | EF581038 |          | EBJS        |
| 25558 | EF581041 |          | EBJS        |
| 25561 | EF581042 |          | EBJS        |
| 25564 | EF581043 |          | EBJS        |
| 25573 | EF581044 |          | EBJS        |
| 25575 | EF581045 |          | EBJS        |
| 25576 | EU130634 | EU130590 | Cuyabeno    |
| 25577 | EU130635 | EU130591 | Cuyabeno    |
| 25579 | EF581046 | EU130592 | EBJS        |
| 25580 | EF581047 |          | EBJS        |
| 25599 | EU130636 | EU130593 | Auca 14     |
| 25601 | EU130674 |          | Hola Vida   |
| 25654 | EU130675 | EU130623 | Hola Vida   |
| 25655 | EU130676 |          | Hola Vida   |
| 25658 |          | EU130624 | Hola Vida   |
| 25660 | EU130677 |          | Hola Vida   |
| 25700 |          | EU130625 | Hola Vida   |
| 25751 | EF581055 |          | EBJS        |
| 25756 | EF581056 |          | EBJS        |
| 25757 | EF581054 |          | EBJS        |
| 25759 | EF581053 | EU130596 | EBJS        |

|       |          |          |                                  |
|-------|----------|----------|----------------------------------|
| 25764 | EF581057 |          | EBJS                             |
| 25770 | EF581058 |          | EBJS                             |
| 25773 | EF581060 |          | EBJS                             |
| 25774 | EF581061 |          | EBJS                             |
| 25776 | EF581059 |          | EBJS                             |
| 25782 | EF581062 |          | EBJS                             |
| 25783 | EF581063 |          | EBJS                             |
| 25807 | EU130637 |          | Chonta Yacu                      |
| 25808 | EU130638 | EU130597 | Chonta Yacu                      |
| 25809 | EU130639 |          | Chonta Yacu                      |
| 25810 | EU130640 | EU130598 | Chonta Yacu                      |
| 25811 | EU130641 |          | Chonta Yacu                      |
| 25831 |          | EU130599 | Chonta Yacu                      |
| 25838 |          | EU130600 | Chonta Yacu                      |
| 25839 | EU130642 | EU130601 | Serena                           |
| 25842 |          | EU130603 | Serena                           |
| 25845 | EU130643 |          | Serena                           |
| 25846 | EU130644 |          | Serena                           |
| 25847 | EU130646 | EU130604 | Serena                           |
| 25854 | EU130645 |          | Serena                           |
| 25855 |          | EU130602 | Serena                           |
| 19664 | EU130577 | EU130579 | <i>E. acuminatus</i> Yasuní      |
| 25613 | EU130578 | EU130580 | <i>E. quaquaversus</i> Hola Vida |

---
