# Supplementary material for: Cryptic diversity and deep divergence in an upper Amazonian leaflitter frog, Eleutherodactylus ockendeni
Source: PubMed Central journal article supplement (PMC2254618; doi:10.1186/1471-2148-7-247), 2007-12-21
Supplement: 1471-2148-7-247-S2.pdf [file 1471-2148-7-247-S2.pdf]

| Clade                               |    | 1                                          | 2 | 3 | 4 | 5 | 6 | 7 | 8 | 9 | 10 | 11 | 12 | 13 | 14 | 15 | 16 | 17 | 18 | 19 | 20 |
|-------------------------------------|----|--------------------------------------------|---|---|---|---|---|---|---|---|----|----|----|----|----|----|----|----|----|----|----|
| South-eastern <<br>-----<br>Lowland | 1  | <i>E. ockendeni</i> Kapawi                 |   |   |   |   |   |   |   |   |    |    |    |    |    |    |    |    |    |    |    |
|                                     | 2  | <i>E. ockendeni</i> Auca 14                |   |   |   |   |   |   |   |   |    |    |    |    |    |    |    |    |    |    |    |
|                                     | 3  | <i>E. ockendeni</i> EBJs/Puca Chicta       |   |   |   |   |   |   |   |   |    |    |    |    |    |    |    |    |    |    |    |
|                                     | 4  | <i>E. ockendeni</i> EBJs                   |   |   |   |   |   |   |   |   |    |    |    |    |    |    |    |    |    |    |    |
|                                     | 5  | <i>E. ockendeni</i> EBJs                   |   |   |   |   |   |   |   |   |    |    |    |    |    |    |    |    |    |    |    |
|                                     | 6  | <i>E. ockendeni</i> Serena/Puca Chicta     |   |   |   |   |   |   |   |   |    |    |    |    |    |    |    |    |    |    |    |
|                                     | 7  | <i>E. ockendeni</i> EBJs                   |   |   |   |   |   |   |   |   |    |    |    |    |    |    |    |    |    |    |    |
|                                     | 8  | <i>E. ockendeni</i> EBJs                   |   |   |   |   |   |   |   |   |    |    |    |    |    |    |    |    |    |    |    |
|                                     | 9  | <i>E. ockendeni</i> Yasuni                 |   |   |   |   |   |   |   |   |    |    |    |    |    |    |    |    |    |    |    |
|                                     | 10 | <i>E. ockendeni</i> La Selva               |   |   |   |   |   |   |   |   |    |    |    |    |    |    |    |    |    |    |    |
|                                     | 11 | <i>E. ockendeni</i> Auca 14                |   |   |   |   |   |   |   |   |    |    |    |    |    |    |    |    |    |    |    |
| -----<br>Upland                     | 12 | <i>E. ockendeni</i> Cuyabeno               |   |   |   |   |   |   |   |   |    |    |    |    |    |    |    |    |    |    |    |
|                                     | 13 | <i>E. ockendeni</i> Cuyabeno               |   |   |   |   |   |   |   |   |    |    |    |    |    |    |    |    |    |    |    |
|                                     | 14 | <i>E. ockendeni</i> EBJs                   |   |   |   |   |   |   |   |   |    |    |    |    |    |    |    |    |    |    |    |
|                                     | 15 | <i>E. ockendeni</i> Chonta Yacu            |   |   |   |   |   |   |   |   |    |    |    |    |    |    |    |    |    |    |    |
|                                     | 16 | <i>E. ockendeni</i> Llanganates            |   |   |   |   |   |   |   |   |    |    |    |    |    |    |    |    |    |    |    |
|                                     | 17 | <i>E. ockendeni</i> Cando/Llang./Sta Clara |   |   |   |   |   |   |   |   |    |    |    |    |    |    |    |    |    |    |    |
|                                     | 18 | <i>E. ockendeni</i> Santa Clara            |   |   |   |   |   |   |   |   |    |    |    |    |    |    |    |    |    |    |    |
|                                     | 19 | <i>E. ockendeni</i> Santa Clara            |   |   |   |   |   |   |   |   |    |    |    |    |    |    |    |    |    |    |    |
|                                     | 20 | <i>E. ockendeni</i> Santa Clara            |   |   |   |   |   |   |   |   |    |    |    |    |    |    |    |    |    |    |    |
|                                     | 21 | <i>E. ockendeni</i> Hola Vida              |   |   |   |   |   |   |   |   |    |    |    |    |    |    |    |    |    |    |    |
